# Supplementary material for: Toll-Like Receptor-Mediated Cardiac Injury during Experimental Sepsis
Source: Hindawi journal article supplement (doi:10.1155/2020/6051983), 2020-01-10
Supplement: f1 [file 6051983.f1.pdf]

s

500 **Supplemental Material**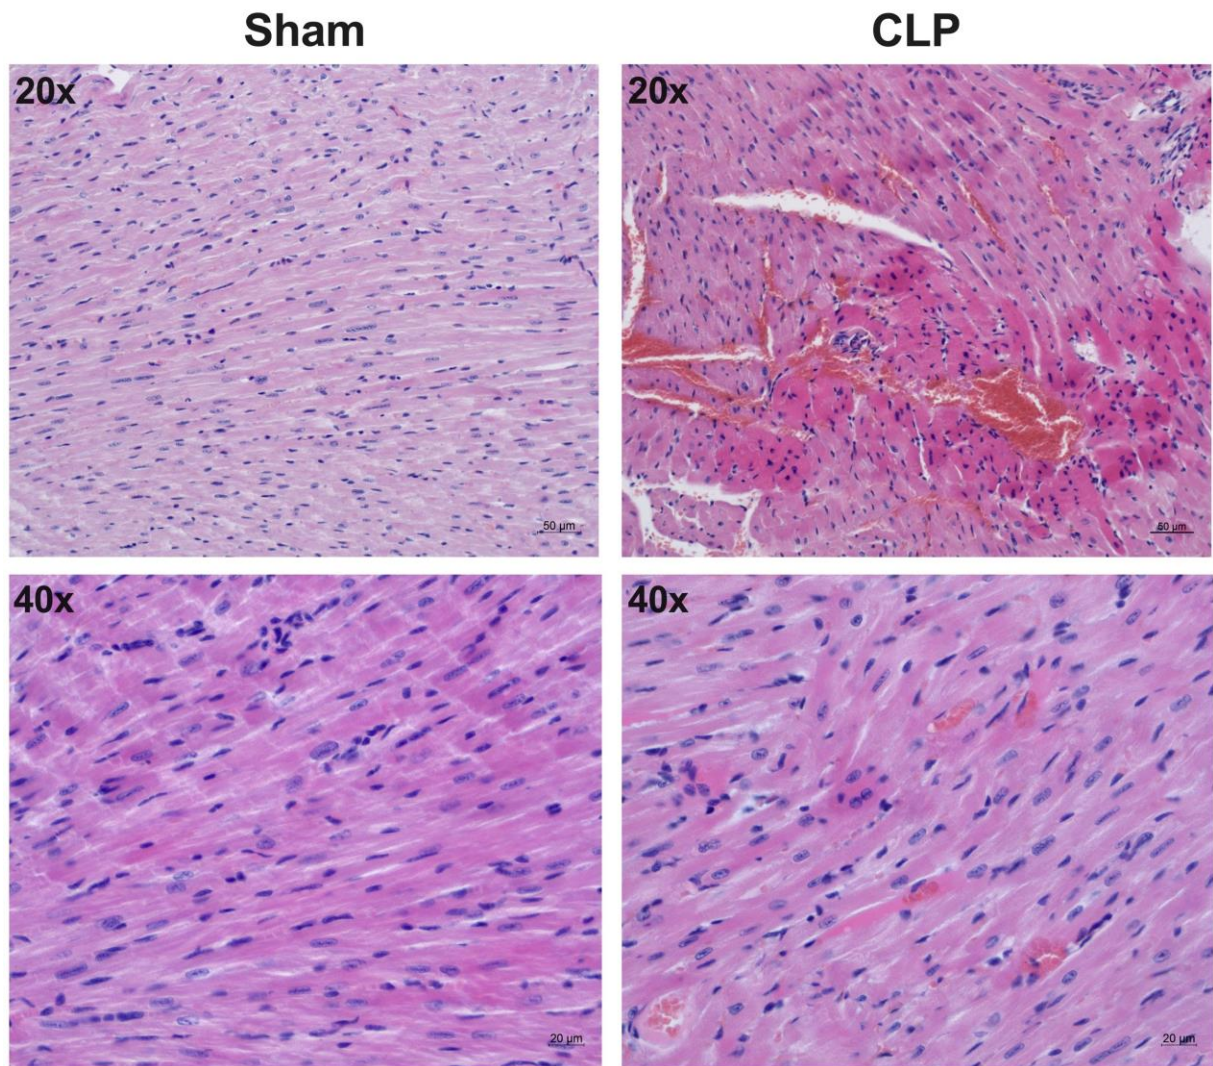

501

502

503

504

505

**Supplemental Figure 1:** Haematoxylin and Eosin staining of left ventricles of sham and CLP mice. Representative images were taken in 20x and 40x magnification. Mice received either sham-treatment or CLP treatment for 24 h.
